# Supplementary material for: Short- and long-term mortality in patients with type 2 diabetes after myocardial infarction– a nationwide registry study
Source: PubMed Central journal article supplement — Cardiovasc Diabetol. 2024 Oct 30;23:390. doi: 10.1186/s12933-024-02479-6 (PMC11526664; doi:10.1186/s12933-024-02479-6), 2024-10-30
Supplement: 12933_2024_2479_MOESM1_ESM.pdf [file 12933_2024_2479_MOESM1_ESM.pdf]

| <b>Antidiabetic medication</b>                     | <b>ATC codes</b>                                                                                                                                                                                      |
|----------------------------------------------------|-------------------------------------------------------------------------------------------------------------------------------------------------------------------------------------------------------|
| Biguanides (Metformin)                             | A10BA, A10BD01, A10BD02, A10BD03, A10BD05,<br>A10BD07, A10BD08, A10BD10, A10BD11, A10BD13,<br>A10BD14, A10BD15, A10BD16, A10BD17, A10BD18,<br>A10BD20, A10BD22, A10BD23, A10BD25, A10BD26,<br>A10BD27 |
| Dipeptidyl peptidase 4 (DDP-4) inhibitors          | A10BH, A10BD07, A10BD08, A10BD09, A10BD10,<br>A10BD11, A10BD12, A10BD13, A10BD18, A10BD19,<br>A10BD21, A10BD22, A10BD24, A10BD25, A10BD27                                                             |
| Sulfonylureas                                      | A10BB, A10BD01, A10BD02                                                                                                                                                                               |
| Thiazolidinediones                                 | A10BG, A10BD03, A10BD04, A10BD05, A10BD06,<br>A10BD09, A10BD26                                                                                                                                        |
| Sodium-glucose co-transporter 2 (SGLT2) inhibitors | A10BK, A10BD15, A10BD16, A10BD19, A10BD20,<br>A10BD21, A10BD23, A10BD24, A10BD25, A10BX09,<br>A10BX12                                                                                                 |
| Glugacon-like peptide-1 (GLP-1) analogues          | A10BJ, A10BX02, A10BX07, A10BX10                                                                                                                                                                      |
| Sulfonamides                                       | A10BC                                                                                                                                                                                                 |
| Alpha glucosidase inhibitors                       | A10BF, A10BD17                                                                                                                                                                                        |
| Other per oral antidiabetics                       | A10BX01, A10BX02, A10BX03, A10BX04, A10BX05,<br>A10BX06, A10BX08, A10BX15, A10BX16, A10BX17,<br>A10BX18, A10BD14                                                                                      |
| Insulin                                            | A10A                                                                                                                                                                                                  |

**Supplemental Table 1.** Classification of antidiabetic medications and Anatomical Therapeutic Chemical (ATC) classification codes used for identification.

| <b>Antidiabetic medication</b>                     | <b>Used by</b> |
|----------------------------------------------------|----------------|
| Biguanides (Metformin)                             | 79.4%          |
| Dipeptidyl peptidase 4 (DDP-4) inhibitors          | 30.7%          |
| Sulfonylureas                                      | 27.6%          |
| Thiazolidinediones                                 | 4.5%           |
| Sodium-glucose co-transporter 2 (SGLT2) inhibitors | 2.9%           |
| Glucagon-like peptide-1 (GLP-1) analogues          | 2.4%           |
| Sulfonamides                                       | -              |
| Alpha glucosidase inhibitors                       | -              |
| Other per oral antidiabetics                       | 1.8%           |
| Insulin                                            | 34.9%          |

**Supplemental Table 2.** Usage of antidiabetic medications by study patients with type 2 diabetes within 6 months prior to index MI.
